# Supplementary material
Source: publisher site journal article supplement (https://www.dovepress.com/article/412626)
Supplement: Supplementary file 1 [file get_supplementary_file.php]

**Supplementary**

**1. Supplementary Table S1**

**Table S1: Search term list**

| **Databases** | **Pubmed** | **The Cochrane Library** | **Embase** | **Web of Science (WOS)** |
| --- | --- | --- | --- | --- |
| **Search  terms** | pulmonary disease, chronic obstructive chronic obstructive lung disease chronic obstructive pulmonary diseases COAD COPD chronic obstructive airway disease airflow obstruction chronic airflow obstructions chronic chronic airflow obstructions chronic airflow obstruction Interleukin-17 IL-17 Interleukin-17F IL-17F Interleukin-17A IL-17A | Pulmonary Disease, Chronic Obstructive COPD Chronic Obstructive Pulmonary Disease Chronic Obstructive Lung Disease Chronic Obstructive Airway Disease COAD Chronic Airflow Obstruction Airflow Obstruction, Chronic Chronic Airflow Obstructions Interleukin-17A Interleukin 17A IL-17A Interleukin 17 IL-17 | chronic obstructive lung diseas chronic airflow obstruction chronic airway obstruction chronic obstructive bronchopulmonary disease chronic obstructive lung disorder chronic obstructive pulmonary disease chronic obstructive pulmonary disorder chronic obstructive respiratory disease copd lung chronic obstructive disease lung disease, chronic obstructive obstructive chronic lung disease obstructive chronic pulmonary interleukin 17 il 17a il 17 interleukin 17a | Chronic Obstructive Pulmonary Diseases COAD COPD Chronic Obstructive Airway Disease Airflow Obstruction, Chronic Airflow Obstructions, Chronic Chronic Airflow Obstructions Chronic Airflow Obstruction IL-17A Interleukin 17 IL-17 Interleukin-17 Interleukin 17A |

**Abbreviations**:COPD：chronic obstructive respiratory disease. COAD: chronic obstructive airway disease. IL-17: Interleukin-17

**2. Supplementary Table S2**

**Table S2: Quality assess for cohort studies (NOS)**

| Inclusion studies |  | Selection | | | | Comparability | Exposure | | | Score |
| --- | --- | --- | --- | --- | --- | --- | --- | --- | --- | --- |
| study | year | ① | ② | ③ | ④ | ⑤ | ⑥ | ⑦ | ⑧ | ‒ |
| Nailga  Kubysheva | 2020 | 1 | 1 | 1 | 0 | 1 | 1 | 0 | 1 | 6 |
| ChenQingYun | 2018 | 1 | 1 | 1 | 1 | 0 | 1 | 1 | 0 | 6 |
| LiWei | 2018 | 1 | 1 | 0 | 1 | 1 | 1 | 1 | 0 | 6 |
| ShenghuaJiang | 2018 | 1 | 1 | 1 | 0 | 1 | 1 | 0 | 1 | 6 |
| G-Z Ding | 2018 | 1 | 1 | 1 | 0 | 1 | 1 | 1 | 0 | 6 |
| Yong Zou | 2016 | 1 | 1 | 1 | 0 | 1 | 1 | 0 | 0 | 5 |
| HuayingWang | 2015 | 1 | 1 | 0 | 0 | 1 | 1 | 0 | 1 | 5 |
| HaijunLi | 2015 | 1 | 1 | 1 | 1 | 1 | 1 | 0 | 0 | 6 |
| XiangNanLi | 2015 | 1 | 1 | 1 | 1 | 1 | 1 | 0 | 0 | 6 |
| Lizhang | 2013 | 1 | 1 | 1 | 0 | 1 | 1 | 0 | 0 | 5 |

Abbreviations:①. Is the case definition adequate? ②. Representativeness of the cases, ③. Selection of Controls, ④. Definition of Controls,⑤. Comparability of cases and controls on the basis of the design or analysis, ⑥. Ascertainment of exposure, ⑦. Same method of ascertainment for cases and controls, ⑧. Non-Response rate

**2. Supplementary Figures**


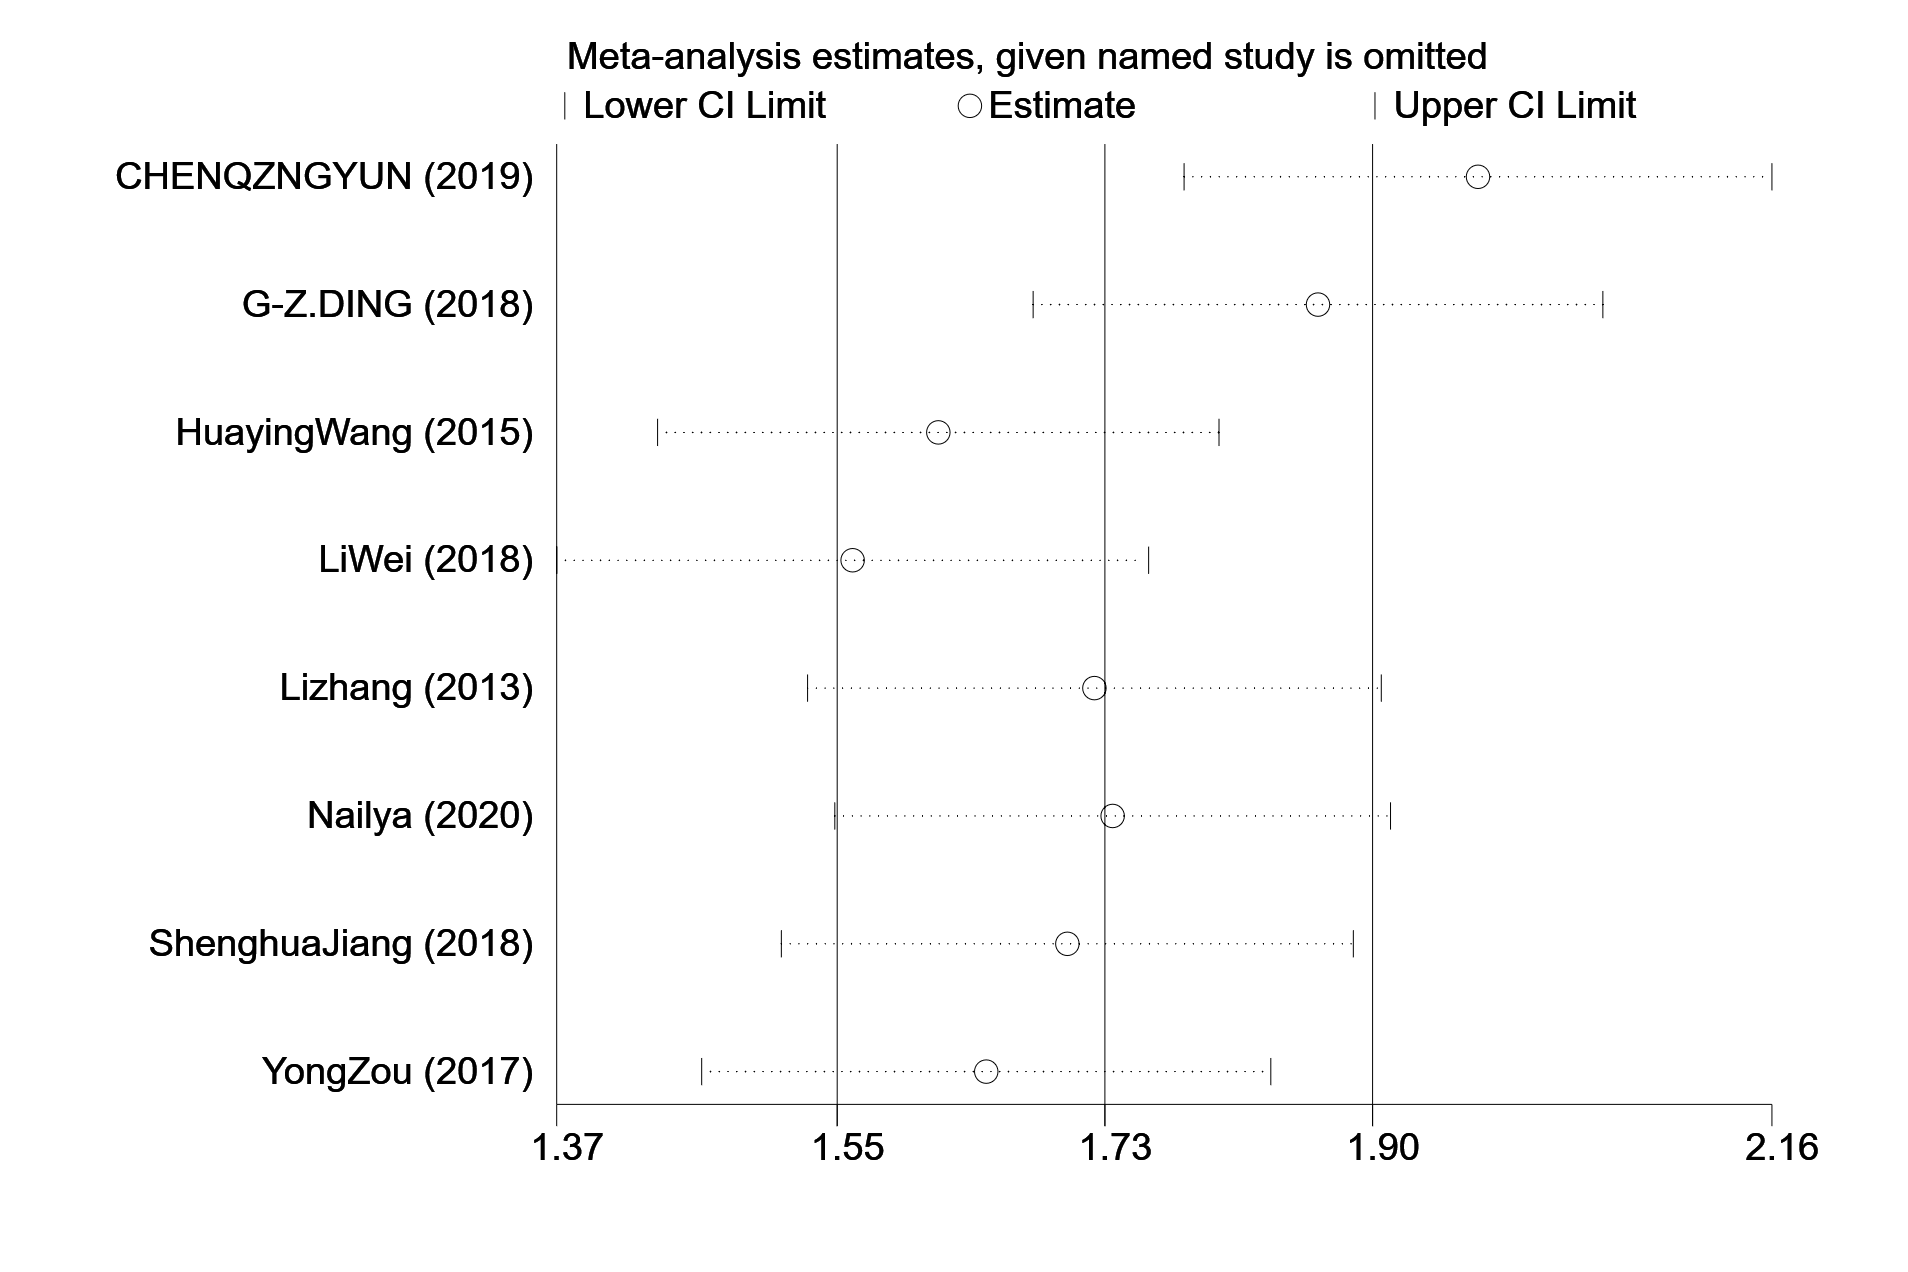


Figure S1 Sensitivity analysis between stable COPD and control serum IL-17.


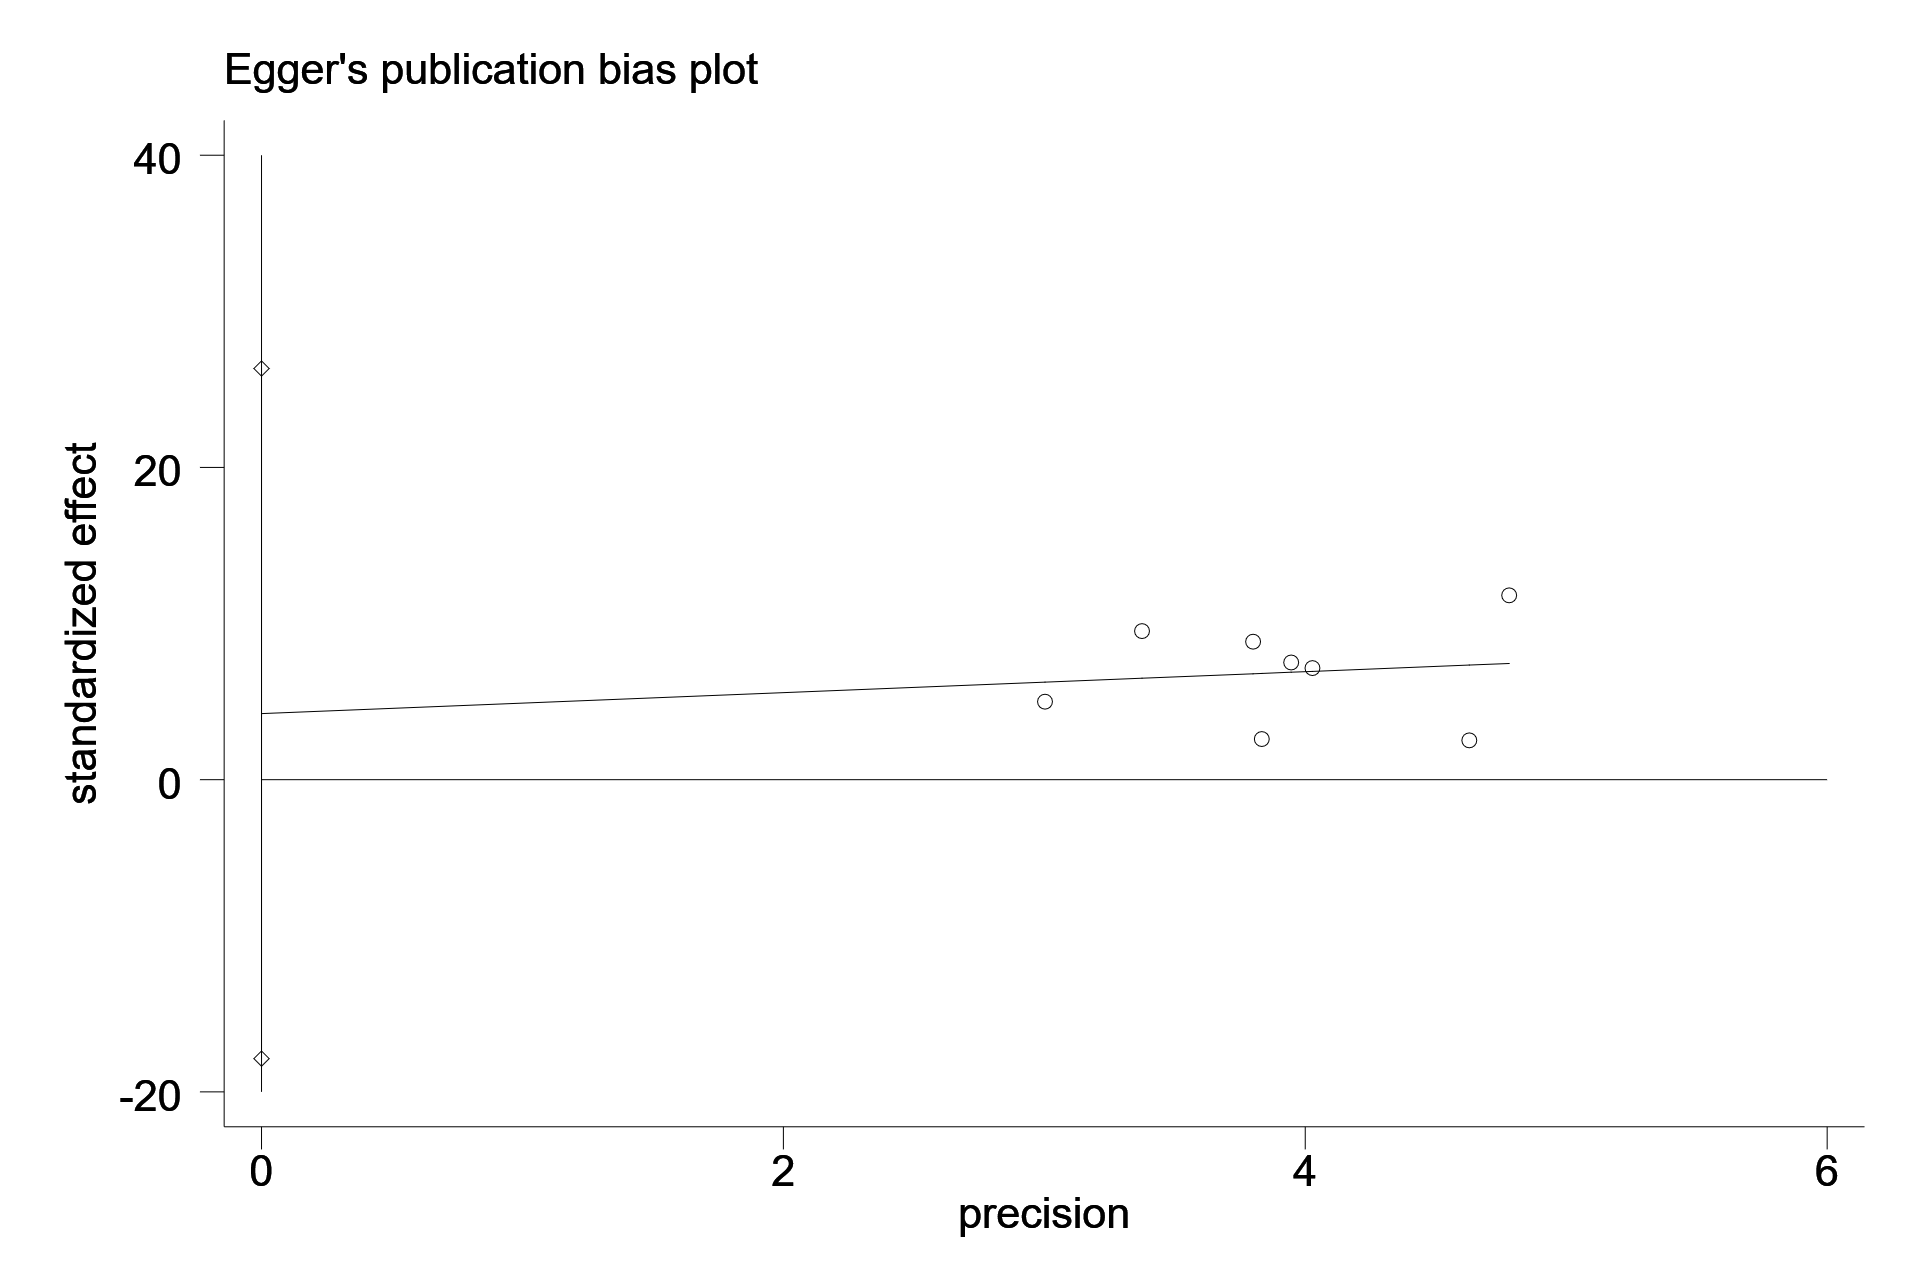


Figure S2 Egger’s publication bias plot for standardized effect ( *P*=0.656 ).


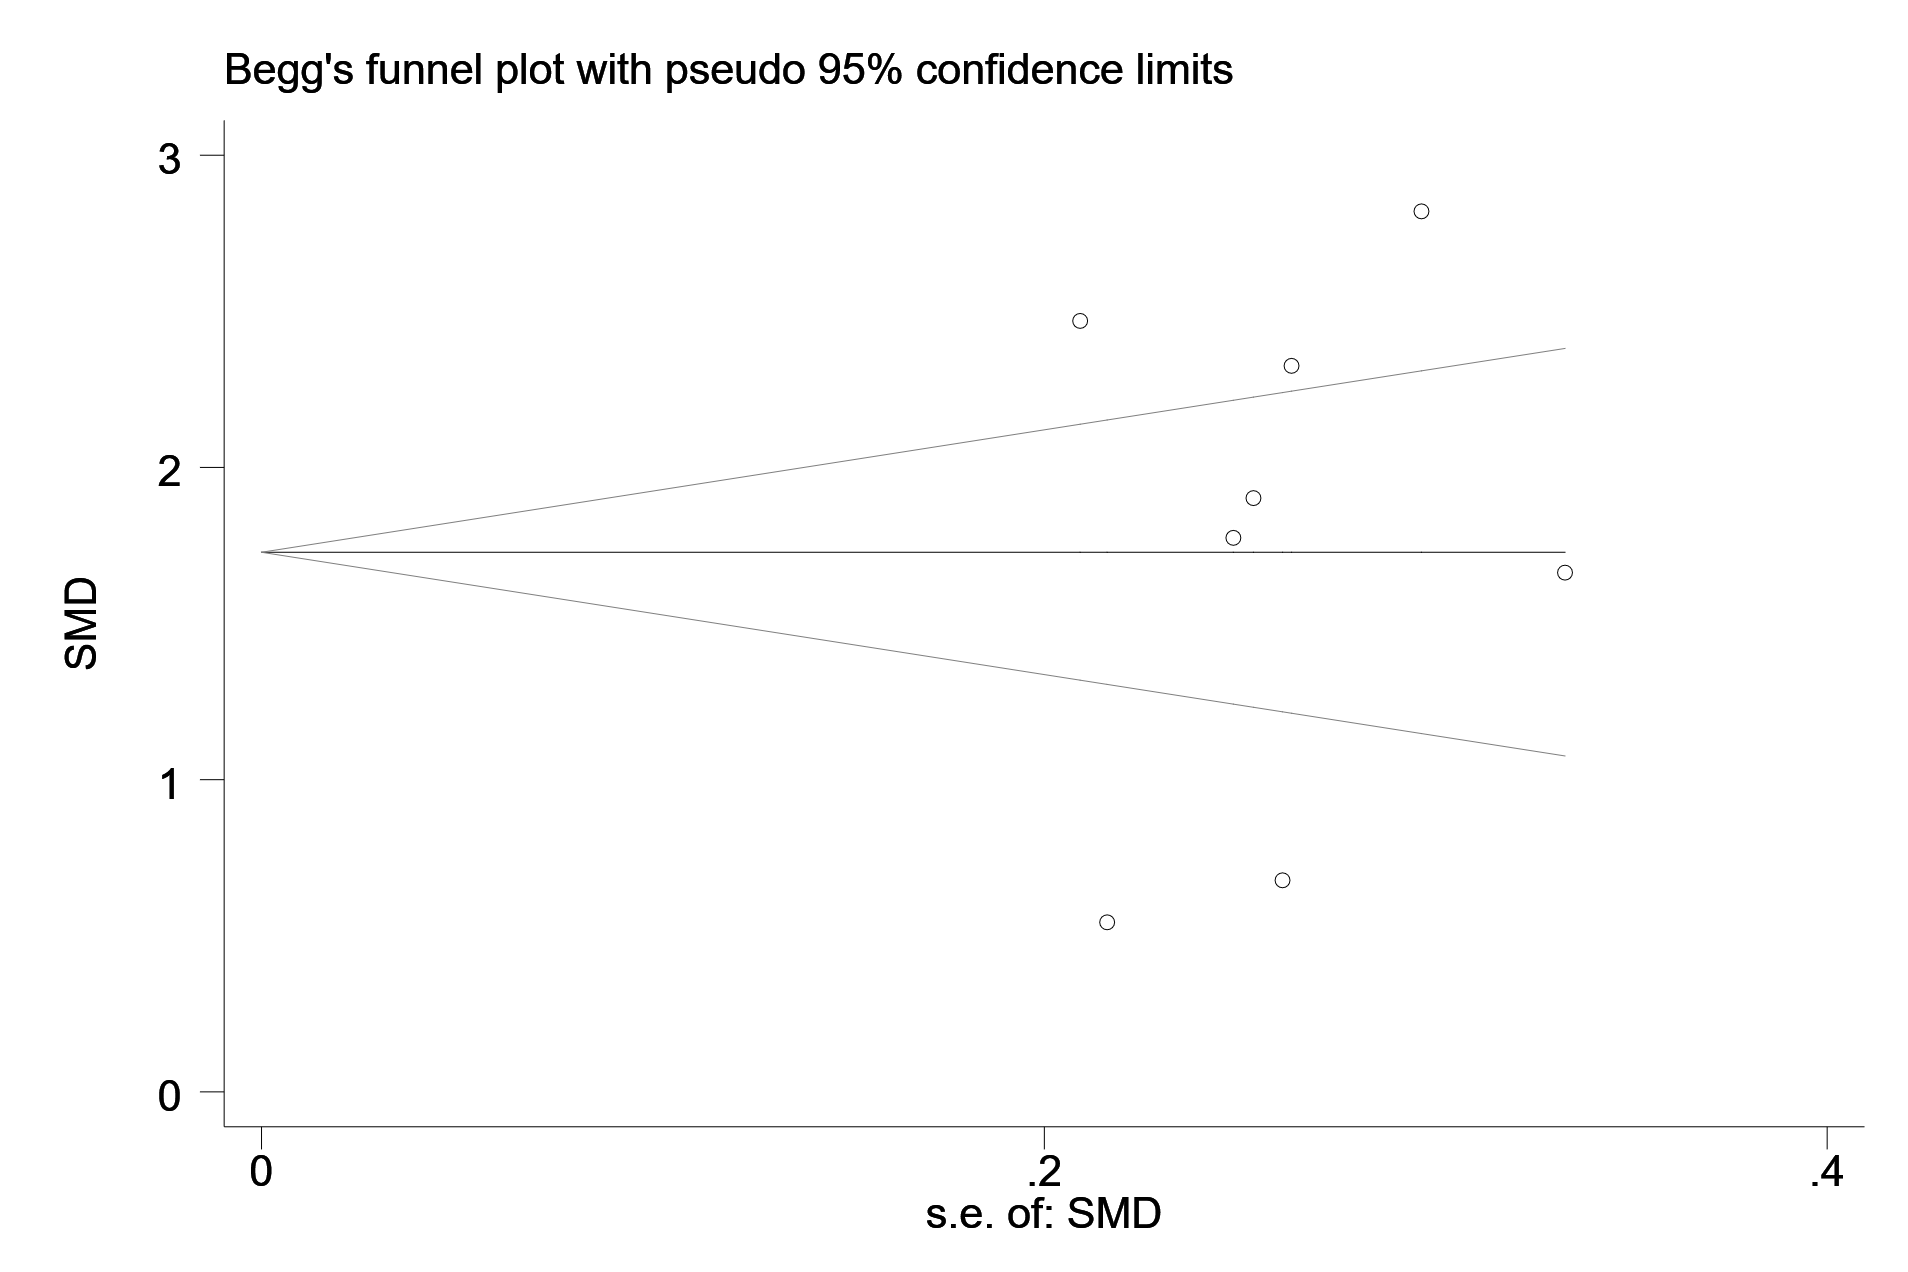


Figure S3 Begg's publication bias plot for standardized effects (*P*=0.902).

**3.Search Strategies**

1. **Pubmed**

Search("pulmonary disease, chronic obstructive"[MeSH Terms] OR ("chronic obstructive lung disease"[Title/Abstract] OR "chronic obstructive pulmonary diseases"[Title/Abstract] OR "COAD"[Title/Abstract] OR "COPD"[Title/Abstract] OR "chronic obstructive airway disease"[Title/Abstract] OR "chronic obstructive pulmonary disease"[Title/Abstract] OR "airflow obstruction chronic"[Title/Abstract] OR "airflow obstructions chronic"[Title/Abstract] OR "chronic airflow obstructions"[Title/Abstract] OR "chronic airflow obstruction"[Title/Abstract])) AND ("Interleukin-17"[MeSH Terms] OR ("Interleukin-17"[Title/Abstract] OR "IL-17"[Title/Abstract] OR "Interleukin-17F"[Title/Abstract] OR "Interleukin-17F"[Title/Abstract] OR "IL-17F"[Title/Abstract] OR "Interleukin-17A"[Title/Abstract] OR "Interleukin-17A"[Title/Abstract] OR "IL-17A"[Title/Abstract]))

1. **The Cochrane Library**

ID Search

#1 MeSH descriptor: [Pulmonary Disease, Chronic Obstructive] explode all trees

#2 COPD

#3 Chronic Obstructive Pulmonary Disease

#4 Chronic Obstructive Lung Disease

#5 Chronic Obstructive Pulmonary Diseases

#6 Chronic Obstructive Airway Disease

#7 COAD

#8 Chronic Airflow Obstruction

#9 Airflow Obstruction, Chronic

#10 Chronic Airflow Obstructions

#11 Airflow Obstructions, Chronic

#12 #1 OR #2 OR #3 OR #4 OR #5 OR #6 OR #7 OR #8 OR #9 OR #10 OR #11

#13 MeSH descriptor: [Interleukin-17] explode all trees

#14 Interleukin-17A

#15 Interleukin 17A

#16 IL-17A

#17 Interleukin 17

#18 IL-17

#19 #13 OR #14 OR #15 OR #16 OR #17 OR #18

#20 #12 AND #19

1. **EMBASE**

Query('chronic obstructive lung disease'/exp OR (('chronic airflow obstruction;':ab,ti OR 'chronic airway obstruction':ab,ti OR 'chronic obstructive bronchopulmonary disease':ab,ti OR 'chronic obstructive lung disorder':ab,ti OR 'chronic obstructive pulmonary disease':ab,ti OR 'chronic obstructive pulmonary disorder':ab,ti) AND 'chronic obstructive respiratory disease':ab,ti) OR 'chronic pulmonary obstructive disease':ab,ti OR 'chronic pulmonary obstructive disorder':ab,ti OR copd:ab,ti OR 'lung chronic obstructive disease':ab,ti OR 'lung disease, chronic obstructive':ab,ti OR 'obstructive chronic lung disease':ab,ti OR 'obstructive chronic pulmonary':ab,ti) AND ('interleukin 17'/exp OR 'il 17a':ab,ti OR 'il 17':ab,ti OR 'interleukin 17a':ab,ti OR 'interleukin 17':ab,ti) Mapped termsn/a

1. **Web of Science (WOS)**

**#1 Chronic Obstructive Pulmonary Diseases (TOPIC) or COAD (TOPIC) or COPD (TOPIC) or Chronic Obstructive Airway Disease (TOPIC) or Chronic Obstructive Pulmonary Disease (TOPIC) or Airflow Obstruction, Chronic (TOPIC) or Airflow Obstructions, Chronic (TOPIC) or Chronic Airflow Obstructions (TOPIC) or Chronic Airflow Obstruction (TOPIC)**

**#2 IL-17A (TOPIC) or Interleukin 17 (TOPIC) or IL-17 (TOPIC) or Interleukin-17 (TOPIC) or Interleukin 17A (TOPIC)**

#3 #1 AND #2
